# Supplementary material for: Nociceptive Sensory Neurons Mediate Inflammation Induced by Bacillus Anthracis Edema Toxin
Source: PubMed Central journal article supplement (PMC8369925; doi:10.3389/fimmu.2021.642373), 2021-08-03
Supplement: DataSheet_1.pdf [file DataSheet_1.pdf]

**Supplementary Fig 1.** ET-induced paw swelling is independent of targeting ANTXR2 on nociceptive neurons.

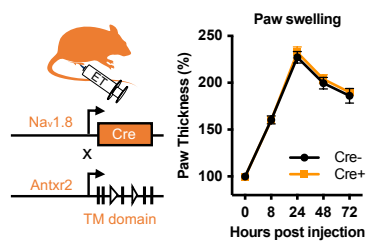

$Nav1.8^{cre/+}/ANTXR2^{fl/fl}$  (Cre+) conditional KO mice or  $Nav1.8^{+/+}/ANTXR2^{fl/fl}$  littermate controls (Cre-) received subcutaneous footpad injection of ET (2 ug PA + 2 ug EF) (n=5-7). No significant differences were detected.

**Supplementary Fig 2.** Nociceptor ablation does not affect mortality induced by *Bacillus anthracis* infection.

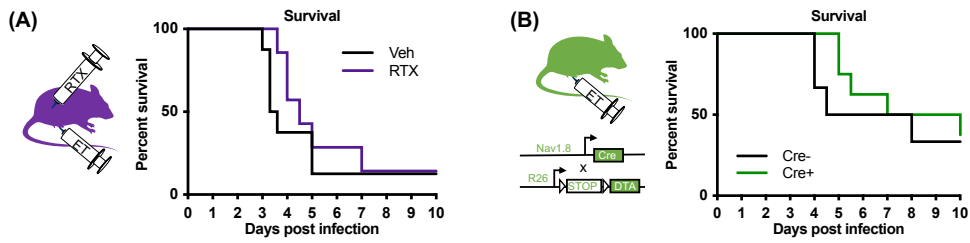

**(A)** RTX- or Vehicle-treated mice received subcutaneous footpad injection of  $1 \times 10^7$  CFUs of *B. anthracis* Sterne (n=7-8).

**(B)**  $Nav1.8^{cre/+}/DTA$  (Cre+) or  $Nav1.8^{+/+}/DTA$  littermate controls (Cre-) received subcutaneous footpad injection of  $1 \times 10^7$  CFUs of *B. anthracis* Sterne (n=7-8).

**Statistical analysis:** **(A, B)** No significant differences detected by the Log-rank (Mantel-Cox) test.

**Supplementary Fig 3.** Nociceptor ablation does not affect bacterial load or dissemination following *Bacillus anthracis* infection.

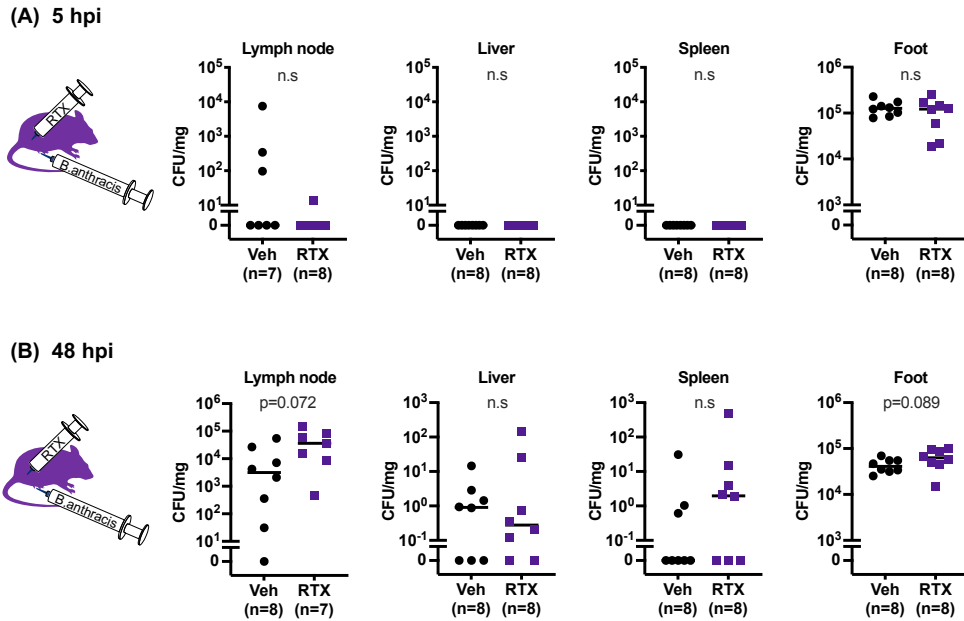

**(A-B)** RTX- or Vehicle-treated mice received subcutaneous footpad injection of  $1 \times 10^7$  CFUs of *B. anthracis* Sterne. At **(A)** 5 or **(B)** 48 hours post-infection (hpi), the ipsilateral foot and popliteal lymph node, liver and spleen were harvested. The bacterial load in each organ was normalized to organ weight.

**Statistical analysis:** **(A, B)** No significant differences detected by unpaired t-test.

**Supplementary Fig 4.** Intrathecal administration of RTX significantly attenuates response to noxious heat.

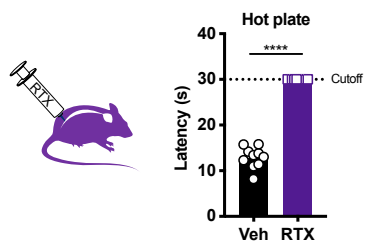

Mice received intrathecal injection of RTX or Vehicle. Following a 4-week rest period, responses to the hot plate test were measured (n=10). \*\*\*\*  $p < 0.0001$ , unpaired t-test.

**Supplementary Fig 5. Protein sequence of EF used in this study.**

ANEHYTESDIKRNHKTEKNKTEKEKFKDSINNLVKTEFTNETLDKIQQTQDLLKKIPKDVLEIYSELGGEIYFTDI  
DLVEHKELQDLSEEEKNSMNSRGEKVPFASRFVFEKKRETPKLIINIKDYAINSEQSKEVYYEIGKGISLDIISKDK  
SLDPEFLNLIKSLSDSDSSDLLFSQKFKEKLELNKSIDINFIKENLTEFQHAFSLAFSYYFAPDHRTVLELYAPD  
MFEYMNKLEKGGFEKISESLKKEGVEKDRIDVLKGEKALKASGLVPEHADAFKKIARELNTYILFRPVNKLATN  
LIKSGVATKGLNVHGKSSDWGPVAGYIPFDQDLSKKHGGQLAVEKGNLENKKSITEHEGEIGKIPLKLDHLRIE  
LKENGILKGGKEIDNGKKYYLLESNNQVYEFRISDENNEVQYKTKGKITVLGEKFNWRNIEVMAKNVEGVK  
PLTADYDLFALAPSLTEIKKQIPQKEWDKVVNTPNSLEKQKGVTNLLIKYGIERKPDSTKGTLSNWQKQMLDRL  
NEAVKYTGTYGGDVVNHGTEQDNEEFPEKDNEIFIINPEGEFILTKNWEMTGRFIEKNITGKDYLYYFNRSYNKI  
APGNKAYIEWTDPITKAKINTIPTSAEFIKNLSSIRSSNVGVYKDSGDKDEFKAKESVKKIAGYLSDYNSANHI  
FSQEKKRKISIFRGIQAYNEIENVLKSQIAPEYKNYFQYLKERITNQVQLLTHQKSNIKLLYKQLNFTENETD  
NFEVFQKIIDEK
